# Supplementary material for: Determinants of Sexual Network Structure and Their Impact on Cumulative Network Measures
Source: PLOS journal article supplement (doi:10.1371/journal.pcbi.1002470), 2012-04-26
Supplement: S8 (10.1371/journal.pcbi.1002470.s008) [file journal.pcbi.1002470.s008]

301 Moved Permanently

# Moved Permanently

The document has moved here.

---

Apache Server at www.ploscompbiol.org Port 80
